# Supplementary figures and images for: Analysis of the human protein interactome and comparison with yeast, worm and fly interaction datasets
Source: Springer Nature journal article supplement (doi:10.1038/ng1747), 2006-02-24

# Supplementary Figure 2

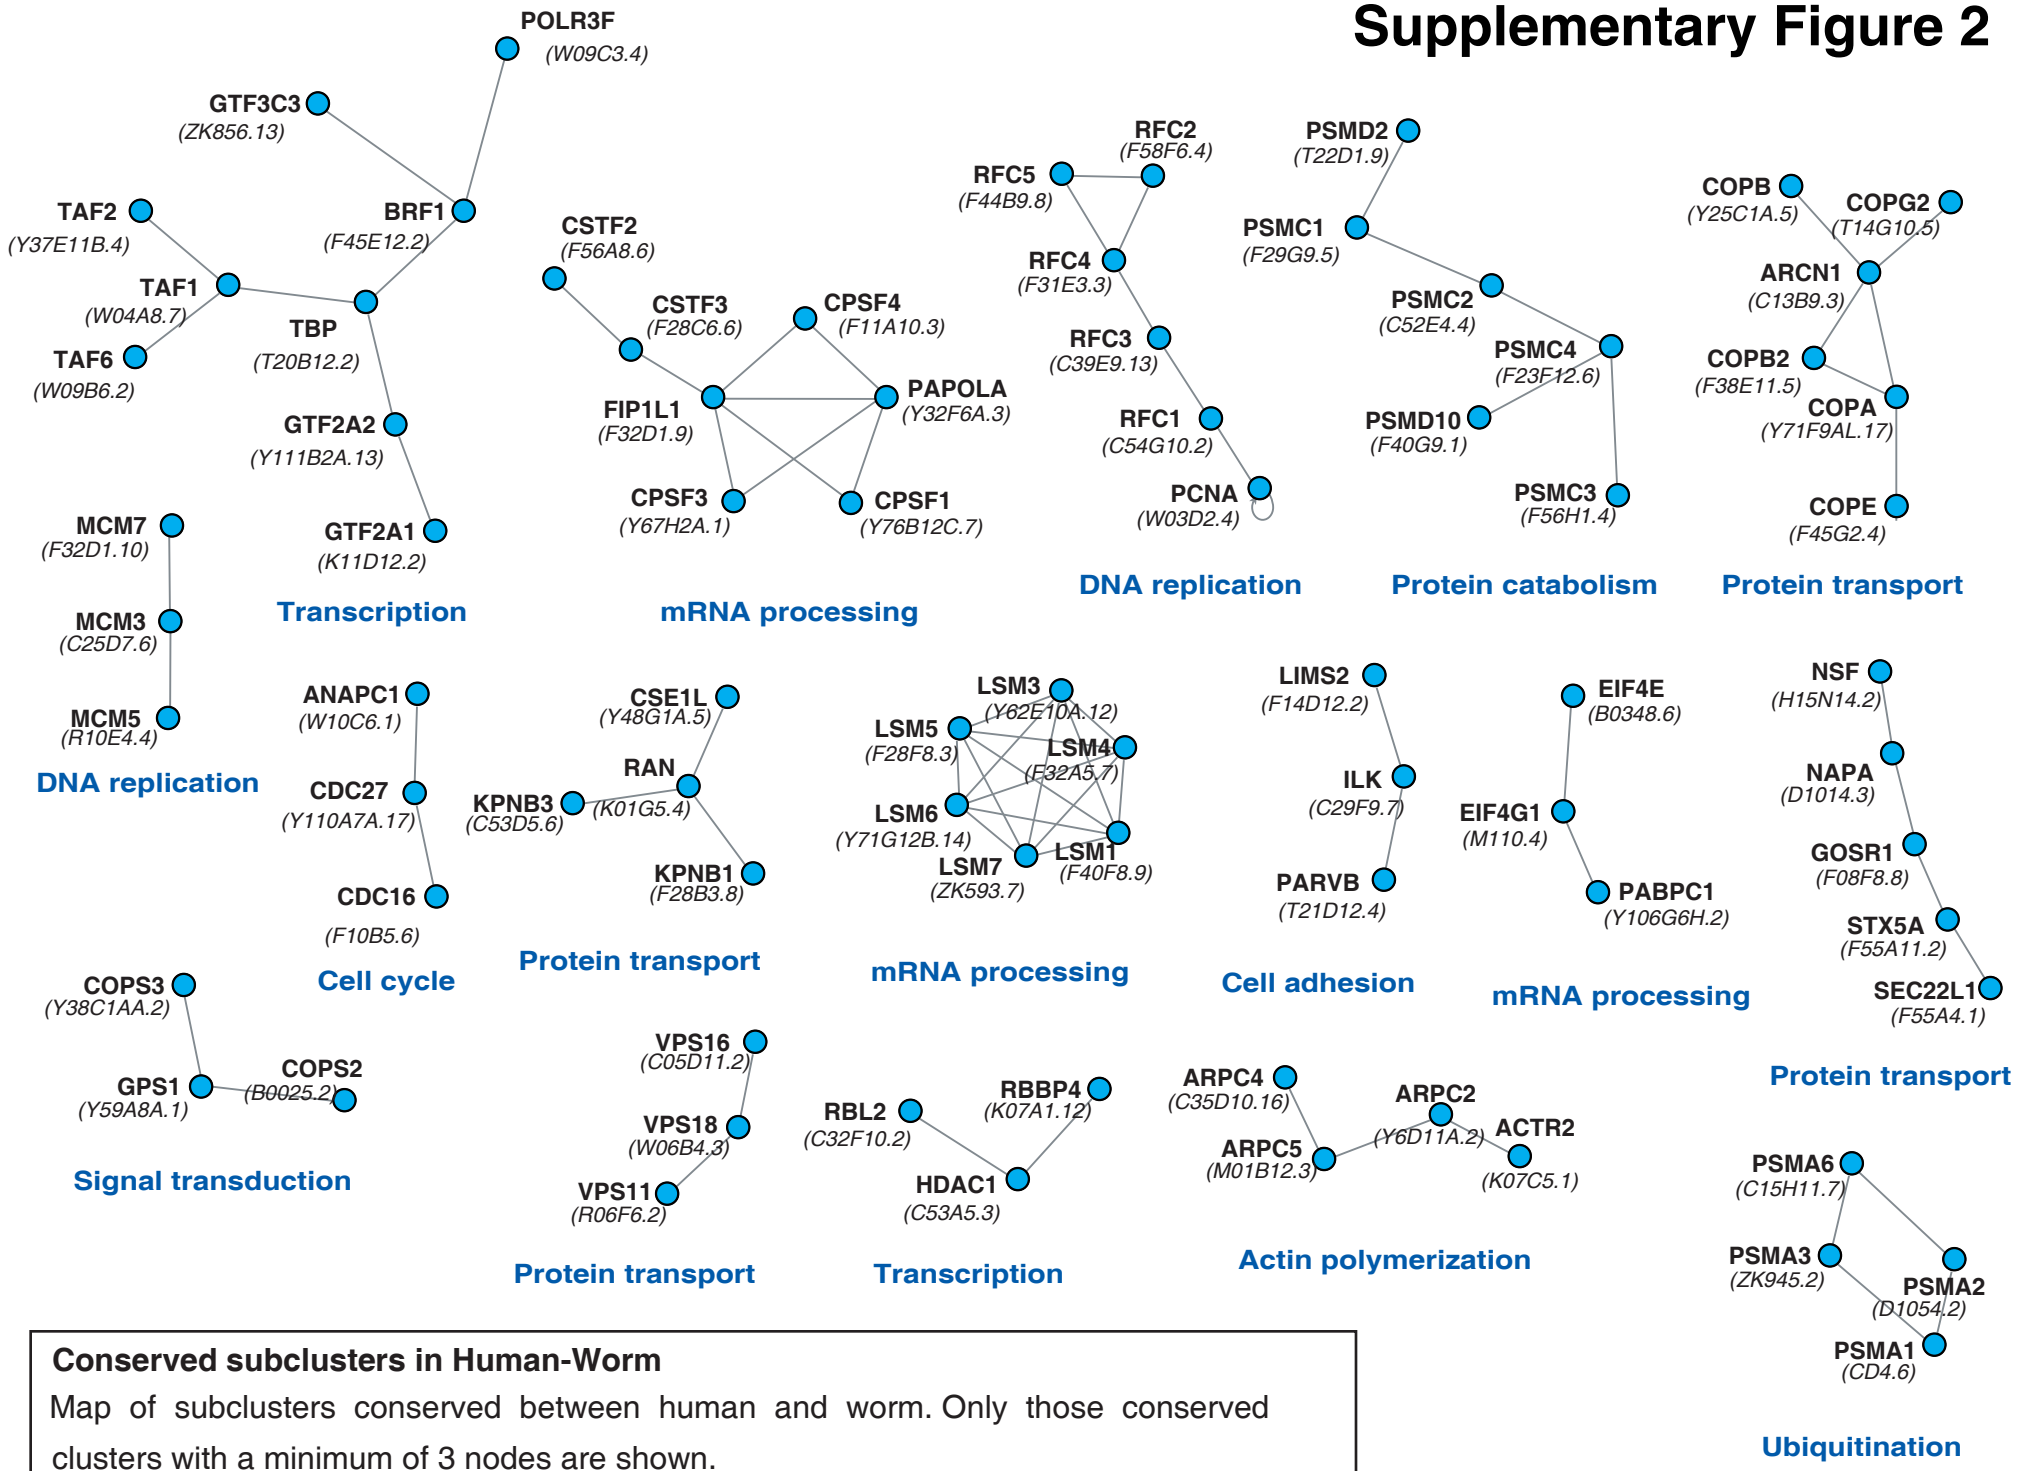

Supplement: ng1747-S2.pdf [file ng1747-S2.pdf]
